# Supplementary material
Source: MDPI journal article supplement (https://www.mdpi.com/2077-0375/13/5/533)
Supplement: s1 [file s1]

Archive with 1 entries (1 files):
- membranes-2381491-SI.pdf
